# Supplementary material for: Undernutrition, Sarcopenia, and Frailty in Fragility Hip Fracture: Advanced Strategies for Improving Clinical Outcomes
Source: PubMed Central journal article supplement (PMC7762043; doi:10.3390/nu12123743), 2020-12-04
Supplement: nutrients-12-03743-s001.pdf [file nutrients-12-03743-s001.pdf]

## Supplementary Materials

**Table S1.** Results of the quality assessment of the study on undernutrition and clinical outcomes.

| Author                      | Criteria 1 | Criteria 2 | Criteria 3 | Criteria 4 | Criteria 5 | Criteria 6 | Criteria 7 | Criteria 8 | Criteria 9 | Criteria 10 | Criteria 11 | Criteria 12 | Criteria 13 | Criteria 14 | Quality Rating |
|-----------------------------|------------|------------|------------|------------|------------|------------|------------|------------|------------|-------------|-------------|-------------|-------------|-------------|----------------|
| Miyaniishi K et al. (2010)  | Y          | Y          | NR         | Y          | N          | Y          | Y          | NA         | Y          | NA          | Y           | NR          | NR          | N           | Good           |
| Koren-Hakim T et al. (2012) | Y          | Y          | Y          | Y          | N          | Y          | Y          | NA         | Y          | NA          | Y           | NR          | NR          | N           | Good           |
| Gumieiro DN et al. (2012)   | Y          | Y          | NR         | Y          | Y          | Y          | Y          | NA         | Y          | NA          | Y           | NR          | Y           | N           | Good           |
| Drevet S et al. (2014)      | Y          | N          | NR         | Y          | N          | Y          | Y          | NA         | Y          | NA          | N           | NR          | NA          | N           | Poor           |
| Goisser S et al. (2015)     | Y          | Y          | Y          | Y          | N          | Y          | Y          | NA         | Y          | NA          | Y           | NR          | Y           | N           | Good           |
| Bajada S et al. (2015)      | Y          | Y          | Y          | Y          | N          | Y          | Y          | NA         | Y          | NA          | Y           | NR          | N           | N           | Good           |
| van Wissen J et al. (2016)  | Y          | Y          | Y          | Y          | N          | Y          | Y          | NA         | Y          | NA          | Y           | NR          | Y           | N           | Fair           |
| Miu KYD et al. (2017)       | Y          | Y          | NR         | Y          | N          | Y          | Y          | NA         | Y          | NA          | Y           | NR          | NR          | N           | Poor           |
| Helminen H et al. (2017)    | Y          | Y          | Y          | Y          | N          | Y          | Y          | NA         | Y          | NA          | Y           | NR          | Y           | N           | Good           |
| Vosoughi AR et al. (2017)   | Y          | Y          | NR         | Y          | N          | Y          | Y          | NA         | Y          | NA          | Y           | NR          | N           | N           | Fair           |
| Mazzola P et al. (2017)     | Y          | Y          | Y          | Y          | N          | Y          | Y          | NA         | Y          | NA          | Y           | NR          | Y           | N           | Good           |
| Inoue T et al. (2017)       | Y          | Y          | Y          | Y          | N          | Y          | Y          | NA         | Y          | NA          | Y           | NR          | Y           | Y           | Good           |
| Nishioka S et al. (2018)    | Y          | Y          | NR         | Y          | Y          | NA         | NA         | NA         | Y          | Y           | Y           | NR          | Y           | Y           | Good           |
| Stone AV et al. (2018)      | Y          | Y          | NR         | Y          | N          | Y          | Y          | NA         | Y          | NA          | Y           | NR          | NR          | N           | Fair           |
| Zanetti M et al. (2018)     | Y          | Y          | Y          | Y          | N          | Y          | Y          | NA         | Y          | NA          | Y           | NR          | Y           | N           | Good           |
| Kotera A et al. (2019)      | Y          | Y          | Y          | Y          | N          | Y          | Y          | NA         | Y          | NA          | Y           | NR          | Y           | N           | Good           |
| Yagi T et al. (2020)        | Y          | Y          | NR         | Y          | N          | Y          | Y          | NA         | Y          | NA          | Y           | NR          | NR          | N           | Fair           |
| Hao L et al. (2020)         | Y          | Y          | Y          | Y          | N          | Y          | Y          | NA         | Y          | NA          | Y           | NR          | Y           | N           | Good           |
| Han TS et al. (2020)        | Y          | Y          | NR         | Y          | Y          | Y          | Y          | NA         | Y          | NA          | Y           | NR          | Y           | N           | Good           |

Quality of the selected observational study was assessed using the National Institutes of Health (NIH) Quality Assessment tool for Observational Cohort and Cross-Sectional Studies. Criteria 1. Was the research question or objective in this paper clearly stated? Criteria 2. Was the study population clearly specified and defined? Criteria 3. Was the participation rate of eligible persons at least 50%? Criteria 4. Were all the subjects selected or recruited from the same or similar populations (including the same time period)? Were inclusion and exclusion

criteria for being in the study prespecified and applied uniformly to all participants? Criteria 5. Was a sample size justification, power description, or variance and effect estimates provided? Criteria 6. For the analyses in this paper, were the exposure(s) of interest measured prior to the outcome(s) being measured? Criteria 7. Was the timeframe sufficient so that one could reasonably expect to see an association between exposure and outcome if it existed? Criteria 8. For exposures that can vary in amount or level, did the study examine different levels of the exposure as related to the outcome (e.g., categories of exposure, or exposure measured as continuous variable)? Criteria 9. Were the exposure measures (independent variables) clearly defined, valid, reliable, and implemented consistently across all study participants? Criteria 10. Was the exposure(s) assessed more than once over time? Criteria 11. Were the outcome measures (dependent variables) clearly defined, valid, reliable, and implemented consistently across all study participants? Criteria 12. Were the outcome assessors blinded to the exposure status of participants? Criteria 13. Was loss to follow-up after baseline 20% or less? Criteria 14. Were key potential confounding variables measured and adjusted statistically for their impact on the relationship between exposure(s) and outcome(s)? The overall judgment is determined by Good, Fair, Poor. CD, cannot determine; NA, not applicable; NR, not reported.

**Table S2.** Results of the quality assessment of the study on sarcopenia and clinical outcomes.

| Author                             | Criteria 1 | Criteria 2 | Criteria 3 | Criteria 4 | Criteria 5 | Criteria 6 | Criteria 7 | Criteria 8 | Criteria 9 | Criteria 10 | Criteria 11 | Criteria 12 | Criteria 13 | Criteria 14 | Quality Rating |
|------------------------------------|------------|------------|------------|------------|------------|------------|------------|------------|------------|-------------|-------------|-------------|-------------|-------------|----------------|
| González-Montalvo JI et al. (2015) | Y          | Y          | Y          | Y          | N          | Y          | Y          | NA         | Y          | NA          | Y           | NR          | Y           | N           | Good           |
| Di Monaco M et al. (2015)          | Y          | Y          | NR         | Y          | N          | Y          | Y          | NA         | Y          | NA          | Y           | NR          | Y           | N           | Good           |
| Landi F et al. (2017)              | Y          | Y          | Y          | Y          | N          | Y          | Y          | NA         | Y          | NA          | Y           | NR          | Y           | N           | Good           |
| Chang C Di et al. (2018)           | Y          | Y          | NR         | Y          | N          | Y          | Y          | NA         | Y          | NA          | Y           | NR          | Y           | N           | Good           |
| Kim YK et al. (2018)               | Y          | Y          | N          | Y          | N          | Y          | Y          | NA         | Y          | NA          | Y           | NR          | Y           | N           | Poor           |
| Yoo J Il et al. (2018)             | Y          | Y          | Y          | Y          | N          | Y          | Y          | NA         | Y          | NA          | N           | NR          | Y           | N           | Poor           |
| Steihaug OM et al. (2018)          | Y          | Y          | N          | Y          | N          | Y          | Y          | NA         | Y          | NA          | Y           | NR          | Y           | N           | Fair           |
| Malafarina V et al. (2019)         | Y          | Y          | Y          | Y          | N          | Y          | Y          | NA         | Y          | Y           | Y           | NR          | Y           | N           | Good           |
| Byun SE et al. (2019)              | Y          | Y          | Y          | Y          | N          | Y          | Y          | NA         | Y          | NA          | Y           | NR          | Y           | N           | Good           |
| Chen YP et al. (2020)              | Y          | Y          | Y          | Y          | N          | Y          | Y          | NA         | Y          | NA          | Y           | NR          | N           | N           | Fair           |
| Chiles Shaffer N et al. (2020)     | Y          | Y          | Y          | Y          | N          | Y          | Y          | NA         | Y          | NA          | Y           | NR          | N           | N           | Good           |
| Shin WC et al. (2020)              | Y          | Y          | Y          | Y          | N          | Y          | Y          | NA         | Y          | NA          | Y           | NR          | Y           | N           | Good           |
| Nagano A et al. (2020)             | Y          | Y          | Y          | Y          | N          | Y          | Y          | NA         | Y          | NA          | Y           | NR          | Y           | Y           | Good           |
| Ha YC et al. (2020)                | Y          | Y          | Y          | Y          | N          | N          | NA         | NA         | Y          | NA          | NA          | NR          | NA          | N           | Fair           |

Quality of the selected observational study was assessed using the National Institutes of Health (NIH) Quality Assessment tool for Observational Cohort and Cross-Sectional Studies. Criteria 1. Was the research question or objective in this paper clearly stated? Criteria 2. Was the study population clearly specified and defined? Criteria 3. Was the participation rate of eligible persons at least 50%? Criteria 4. Were all the subjects selected or recruited from the same or similar populations (including the same time period)? Were inclusion and exclusion criteria for being in the study prespecified and applied uniformly to all participants? Criteria 5. Was a sample size justification, power description, or variance and effect estimates provided? Criteria 6. For the analyses in this paper, were the exposure(s) of interest measured prior to the outcome(s) being measured? Criteria 7. Was the timeframe sufficient so that one could reasonably expect to see an association between exposure and outcome if it existed? Criteria 8. For exposures that can vary in amount or level, did the study examine different levels of the exposure as related to the outcome (e.g., categories of exposure, or exposure measured as continuous variable)? Criteria 9. Were the exposure measures (independent variables) clearly defined, valid, reliable, and implemented consistently across all study participants? Criteria 10. Was the exposure(s) assessed more than once over time? Criteria 11. Were the outcome measures (dependent variables) clearly defined, valid, reliable, and implemented consistently across all study participants? Criteria 12. Were the outcome assessors blinded to the exposure status of participants? Criteria 13. Was loss to follow-up after baseline 20% or less? Criteria 14. Were key potential confounding variables measured and adjusted statistically for their impact on the relationship between exposure(s) and outcome(s)? The overall judgment is determined by Good, Fair, Poor. CD, cannot determine; NA, not applicable; NR, not reported.

**Table S3.** Results of the quality assessment of the study on frailty and clinical outcomes.

| Author                       | Criteria 1 | Criteria 2 | Criteria 3 | Criteria 4 | Criteria 5 | Criteria 6 | Criteria 7 | Criteria 8 | Criteria 9 | Criteria 10 | Criteria 11 | Criteria 12 | Criteria 13 | Criteria 14 | Quality Rating |
|------------------------------|------------|------------|------------|------------|------------|------------|------------|------------|------------|-------------|-------------|-------------|-------------|-------------|----------------|
| Patel KV et al. (2014)       | Y          | Y          | NR         | Y          | N          | Y          | Y          | NA         | Y          | NA          | Y           | NR          | NR          | N           | Good           |
| Krishnan M et al. (2014)     | Y          | N          | NR         | Y          | N          | Y          | Y          | NA         | Y          | NA          | Y           | NR          | NR          | N           | Good           |
| Kistler EA et al. (2015)     | Y          | Y          | Y          | Y          | N          | Y          | Y          | NA         | N          | NA          | Y           | NR          | NR          | N           | Poor           |
| Gleason LJ et al. (2017)     | Y          | Y          | N          | Y          | N          | Y          | Y          | NA         | Y          | NA          | Y           | NR          | NR          | N           | Good           |
| Choi JY et al. (2017)        | Y          | Y          | NR         | Y          | N          | Y          | Y          | NA         | Y          | NA          | Y           | NR          | NR          | N           | Good           |
| Winters AM et al. (2108)     | Y          | Y          | NR         | Y          | N          | Y          | Y          | NA         | Y          | NA          | Y           | NR          | NR          | N           | Good           |
| Vasu BK et al. (2018)        | Y          | Y          | NR         | Y          | N          | Y          | Y          | NA         | Y          | NA          | Y           | NR          | NR          | N           | Poor           |
| Chen CL et al. (2019)        | Y          | Y          | NR         | Y          | N          | Y          | Y          | NA         | Y          | NA          | Y           | NR          | NR          | N           | Fair           |
| Inoue T et al. (2019)        | Y          | Y          | NR         | Y          | N          | Y          | Y          | NA         | Y          | NA          | Y           | NR          | NR          | N           | Good           |
| Van De Ree CLP et al. (2019) | Y          | Y          | Y          | Y          | N          | Y          | Y          | NA         | Y          | NA          | Y           | NR          | N           | N           | Good           |
| Jorissen RN et al. (2020)    | Y          | Y          | NR         | Y          | N          | Y          | Y          | NA         | Y          | NA          | Y           | NR          | Y           | N           | Good           |
| Lu W et al. (2020)           | Y          | Y          | NR         | Y          | N          | Y          | Y          | NA         | N          | NA          | Y           | NR          | N           | N           | Poor           |
| Pizzonia M et al. (2020)     | Y          | Y          | Y          | Y          | Y          | Y          | Y          | NA         | Y          | NA          | Y           | NR          | Y           | N           | Good           |
| Low S et al. (2020)          | Y          | Y          | Y          | Y          | N          | Y          | Y          | NA         | Y          | NA          | Y           | NR          | Y           | N           | Good           |
| Narula S et al. (2020)       | Y          | Y          | NR         | Y          | N          | Y          | Y          | NA         | Y          | NA          | Y           | NR          | NR          | N           | Fair           |

Quality of the selected observational study was assessed using the National Institutes of Health (NIH) Quality Assessment tool for Observational Cohort and Cross-Sectional Studies. Criteria 1. Was the research question or objective in this paper clearly stated? Criteria 2. Was the study population clearly specified and defined? Criteria 3. Was the participation rate of eligible persons at least 50%? Criteria 4. Were all the subjects selected or recruited from the same or similar populations (including the same time period)? Were inclusion and exclusion criteria for being in the study prespecified and applied uniformly to all participants? Criteria 5. Was a sample size justification, power description, or variance and effect estimates provided? Criteria 6. For the analyses in this paper, were the exposure(s) of interest measured prior to the outcome(s) being measured? Criteria 7. Was the timeframe sufficient so that one could reasonably expect to see an association between exposure and outcome if it existed? Criteria 8. For exposures that can vary in amount or level, did the study examine different levels of the exposure as related to the outcome (e.g., categories of exposure, or exposure measured as continuous variable)? Criteria 9. Were the exposure measures (independent variables) clearly defined, valid, reliable, and implemented consistently across all study participants? Criteria 10. Was the exposure(s) assessed more than once over time? Criteria 11. Were the outcome measures (dependent variables) clearly defined, valid, reliable, and implemented consistently across all study participants? Criteria 12. Were the outcome assessors blinded to the exposure status of participants? Criteria 13. Was loss to follow-up after baseline 20% or less? Criteria 14. Were key potential confounding variables measured and adjusted statistically for their impact on the relationship between exposure(s) and outcome(s)? The overall judgment is determined by Good, Fair, Poor. CD, cannot determine; NA, not applicable; NR, not reported.

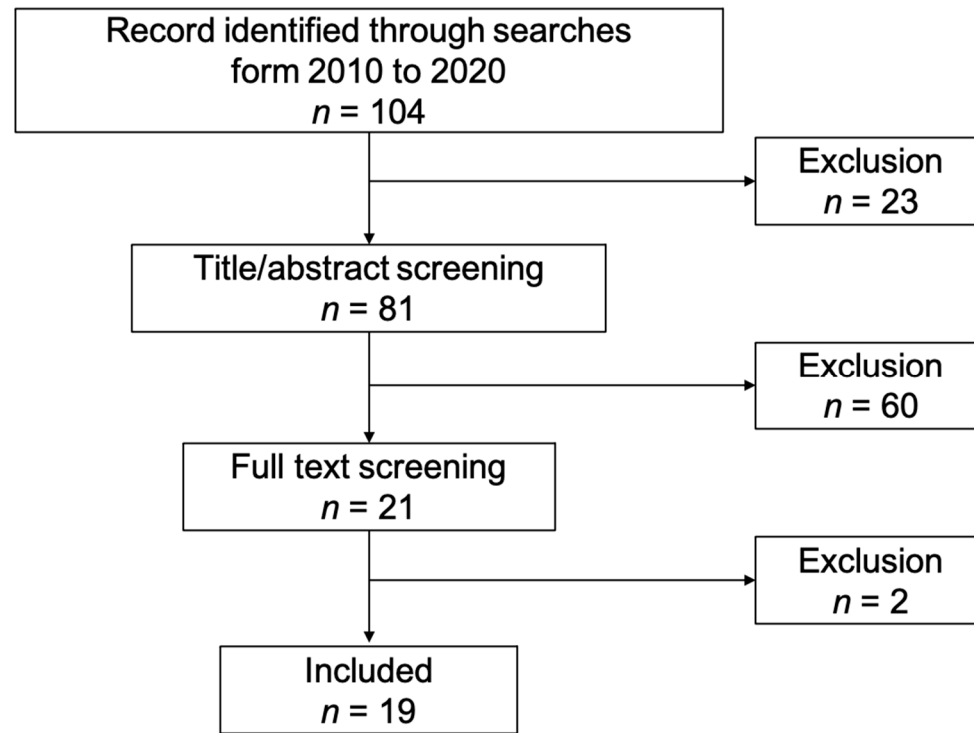

**Figure S1.** Flow diagrams of electronic search strategy for undernutrition with hip fractures.

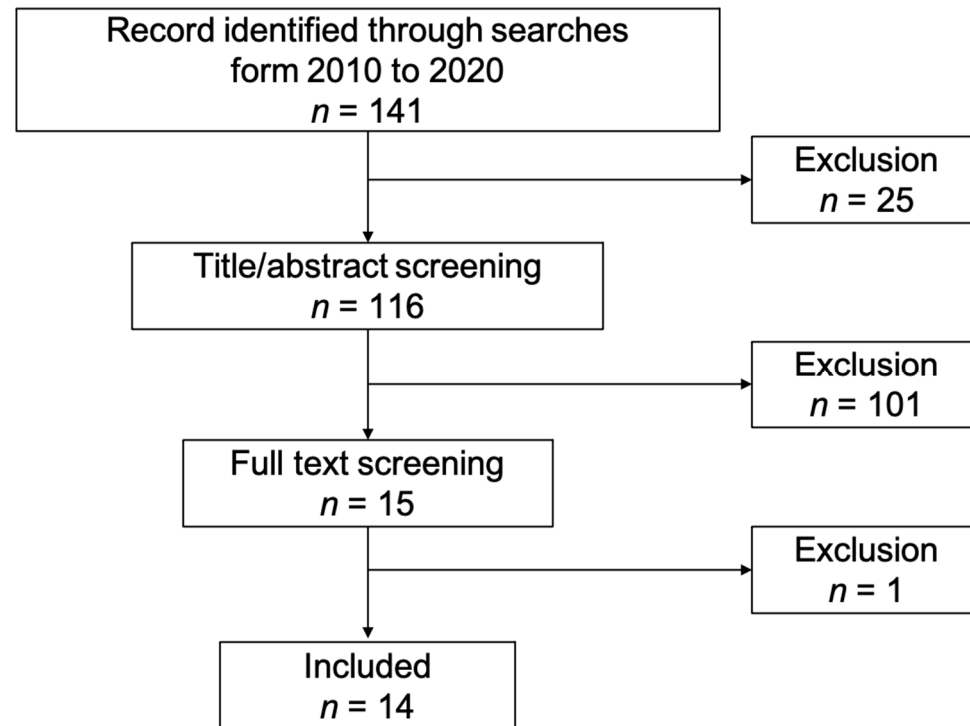

**Figure S2.** Flow diagrams of electronic search strategy for sarcopenia with hip fractures.

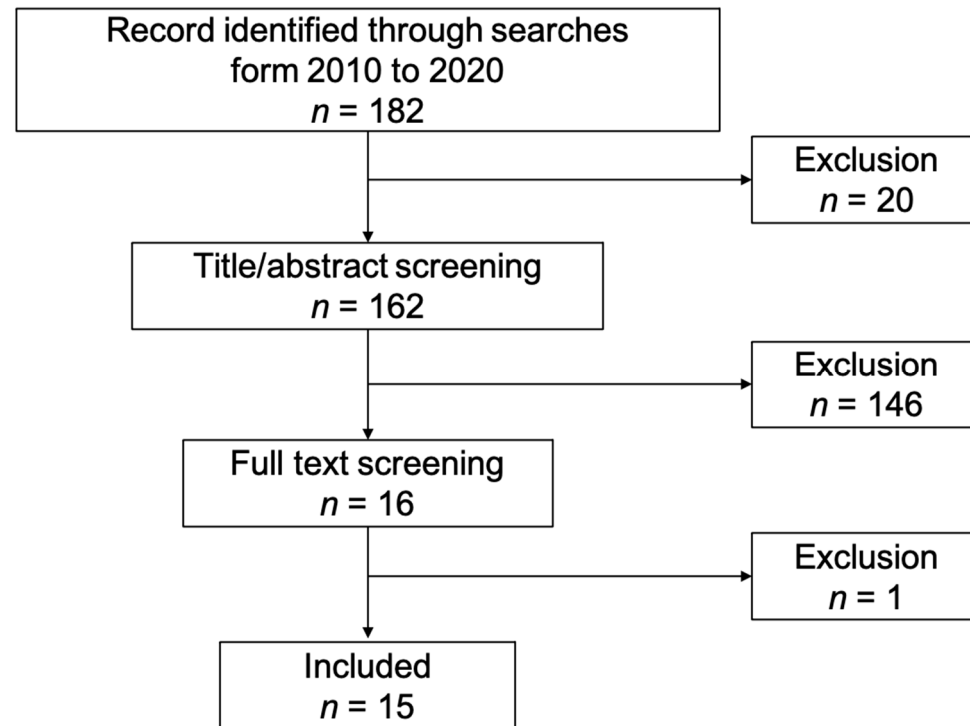

**Figure S3.** Flow diagrams of electronic search strategy for frailty with hip fractures.
